# Supplementary material
Source: PubMed Central journal article supplement (PMC4634095)
Supplement: supp_pp.15.01202_PP2015-01202R1_Table_S3.pdf [file supp_pp.15.01202_PP2015-01202R1_Table_S3.pdf]

**Supplementary Table 3.** Summary of hormone metabolites in 5-d developing caryopses from IL<sub>SD1-2</sub><sup>E</sup> and IL<sub>SD1-2</sub><sup>S</sup>.

|                                  | Gibberellin metabolites (ng/g dry weight) |                 |                 |                 |                 |                 |                  |                  |                  |                  |                  |                  |                  |                  |
|----------------------------------|-------------------------------------------|-----------------|-----------------|-----------------|-----------------|-----------------|------------------|------------------|------------------|------------------|------------------|------------------|------------------|------------------|
|                                  | GA <sub>1</sub>                           | GA <sub>3</sub> | GA <sub>4</sub> | GA <sub>7</sub> | GA <sub>8</sub> | GA <sub>9</sub> | GA <sub>19</sub> | GA <sub>20</sub> | GA <sub>24</sub> | GA <sub>29</sub> | GA <sub>34</sub> | GA <sub>44</sub> | GA <sub>51</sub> | GA <sub>53</sub> |
| IL <sub>SD1-2</sub> <sup>E</sup> | <3.8 <sup>a</sup>                         | n.d.            | n.d.            | n.d.            | <3.8            | n.d.            | 14.9             | n.d.             | <3.8             | n.d.             | 15.3             | 10.9             | 21.6             | 5.6              |
| IL <sub>SD1-2</sub> <sup>S</sup> | n.d. <sup>b</sup>                         | <3.9            | n.d.            | <3.9            | <5              | n.d.            | 17.7             | n.d.             | n.d.             | n.d.             | 12.1             | 9.5              | <12.6            | 4.8              |

  

|                                  | Abscisic acid (ng/g dry weight) <sup>c</sup> |      |       |      |          |        |       |
|----------------------------------|----------------------------------------------|------|-------|------|----------|--------|-------|
|                                  | ABA                                          | DPA  | ABAGE | PA   | 7'OH-ABA | neo-PA | t-ABA |
| IL <sub>SD1-2</sub> <sup>E</sup> | 30.6                                         | 1729 | 106.1 | 35.4 | n.d.     | <3.8   | 15.5  |
| IL <sub>SD1-2</sub> <sup>S</sup> | 22.2                                         | 1177 | 156.5 | 20.5 | n.d.     | <3.9   | 8.0   |

  

|                                  | Auxins (ng/g dry weight) <sup>d</sup> |         |         |         |         |      |
|----------------------------------|---------------------------------------|---------|---------|---------|---------|------|
|                                  | IAA                                   | IAA-Ala | IAA-Asp | IAA-Glu | IAA-Leu | IBA  |
| IL <sub>SD1-2</sub> <sup>E</sup> | 279.3                                 | <3.8    | 83.6    | 14.2    | <3.8    | n.d. |
| IL <sub>SD1-2</sub> <sup>S</sup> | 153.7                                 | n.d.    | 95.2    | 18.7    | <3.9    | n.d. |

  

|                                  | Cytokinins (ng/g dry weight) <sup>e</sup> |       |      |      |      |      |      |      |    |     |
|----------------------------------|-------------------------------------------|-------|------|------|------|------|------|------|----|-----|
|                                  | t-ZOG                                     | c-ZOG | t-Z  | c-Z  | dhZ  | t-ZR | c-ZR | dhZR | iP | iPR |
| IL <sub>SD1-2</sub> <sup>E</sup> | n.d.                                      | 69.4  | n.d. | n.d. | n.d. | n.d. | 5.4  | n.d. | <1 | 4.5 |
| IL <sub>SD1-2</sub> <sup>S</sup> | n.d.                                      | 74.3  | n.d. | <1   | n.d. | n.d. | 7.5  | n.d. | <1 | 7.3 |

<sup>a</sup> Likelihood values of the limit of quantification (LOQ) defined as signal/noise ratio.

<sup>b</sup> Not detected as defined as LOQ<3.0.

<sup>c</sup> *cis*-Abscisic acid (ABA) and its metabolites: Dihydrophaseic acid (DPA), ABA glucose ester (ABAGE), Phaseic acid (PA), 7'-Hydroxy-ABA (7'-OH-ABA), neo-Phaseic acid (neo-PA) and *trans*-ABA (t-ABA).

<sup>d</sup> IAA, indole-3-acetic acid; IAA-Asp, N-(Indole-3-yl-acetyl)-aspartic acid; IAA-Glu, N-(Indole-3-yl-acetyl)-glutamic acid; IAA-Ala, N-(Indole-3-yl-acetyl)-alanine; IAA-Leu, N-(Indole-3-yl-acetyl)-leucine; and IBA, Indole-3-butyric acid.

<sup>e</sup> t-ZOG, *trans*-Zeatin-O-glucoside; c-ZOG, *cis*-Zeatin-O-glucoside; t-Z, *trans*-Zeatin; c-Z, *cis*-Zeatin; dhZ, Dihydrozeatin; t-ZR, *trans*-Zeatin riboside; c-ZR, *cis*-Zeatin riboside; dhZR, Dihydrozeatin riboside; iP, isopentenyladenine; and iPR, iP iboside.
