# Supplementary material
Source: PubMed Central journal article supplement (PMC4634095)
Supplement: supp_pp.15.01202_PP2015-01202R1_Table_S4.pdf [file supp_pp.15.01202_PP2015-01202R1_Table_S4.pdf]

**Supplementary Table S4.** List of accessions of rice germplasm for phylogenetic analysis of OsGA20ox2.

| Name/accession | Species/form                          | Protein <sup>a</sup>             | Source        | GenBank ID <sup>b</sup> |
|----------------|---------------------------------------|----------------------------------|---------------|-------------------------|
| EM93-1         | <i>O. sativa</i> ssp. <i>indica</i>   | SD <sub>1-2</sub> <sup>E</sup>   | China         | KT354861                |
| IR64           | <i>O. sativa</i> ssp. <i>indica</i>   | SD <sub>1-2</sub> <sup>E</sup>   | IRRI          | AY115558                |
| Milyang 23     | <i>O. sativa</i> ssp. <i>indica</i>   | SD <sub>1-2</sub> <sup>E</sup>   | South Korea   | AF465256                |
| IR36           | <i>O. sativa</i> ssp. <i>indica</i>   | SD <sub>1-2</sub> <sup>E</sup>   | IRRI          | EM93-1-like             |
| Liu-t'ou-tu    | <i>O. sativa</i> ssp. <i>indica</i>   | SD <sub>1-2</sub> <sup>E</sup>   | India         | EM93-1-like             |
| W1718          | <i>O. rufipogon</i>                   | SD <sub>1-2</sub> <sup>E</sup>   | China         | EM93-1-like             |
| W1944          | <i>O. rufipogon</i>                   | SD <sub>1-2</sub> <sup>E</sup>   | China         | EM93-1-like             |
| 105670         | <i>O. glumipatula</i>                 | SD <sub>1-2</sub> <sup>Glu</sup> | Brazil        | JN541512                |
| 105561         | <i>O. glumipatula</i>                 | SD <sub>1-2</sub> <sup>Glu</sup> | Colombia      | JN541511                |
| Kaluheenati    | <i>O. sativa</i> ssp. <i>indica</i>   | SD <sub>1-2</sub> <sup>Kal</sup> | Sri Lanka     | AB633615                |
| Muha           | <i>O. sativa</i> ssp. <i>indica</i>   | SD <sub>1-2</sub> <sup>Muh</sup> | Indonesia     | AB633617                |
| 100588         | <i>O. rufipogon</i>                   | SD <sub>1-2</sub> <sup>N</sup>   | Taiwan, China | JN541478                |
| 8952           | <i>O. sativa</i> ssp. <i>indica</i>   | SD <sub>1-2</sub> <sup>N</sup>   | Sri Lanka     | JN541520                |
| Shwe_Nang_Gyi  | <i>O. sativa</i> ssp. <i>indica</i>   | SD <sub>1-2</sub> <sup>N</sup>   | Myanmar       | AB633623                |
| 1005-02        | weed                                  | SD <sub>1-2</sub> <sup>N</sup>   | AR, USA       | JN541434                |
| 18A            | weed                                  | SD <sub>1-2</sub> <sup>N</sup>   | AR, USA       | JN541422                |
| 2002-2-p1      | weed                                  | SD <sub>1-2</sub> <sup>N</sup>   | AR, USA       | JN541462                |
| 2002-2-p21     | weed                                  | SD <sub>1-2</sub> <sup>N</sup>   | AR, USA       | JN541463                |
| PrCoSrt_1      | weed                                  | SD <sub>1-2</sub> <sup>N</sup>   | AR, USA       | JN541444                |
| PrCoTall_1     | weed                                  | SD <sub>1-2</sub> <sup>N</sup>   | AR, USA       | JN541445                |
| PrCoTall_2     | weed                                  | SD <sub>1-2</sub> <sup>N</sup>   | AR, USA       | JN541446                |
| PrCoTall_3     | weed                                  | SD <sub>1-2</sub> <sup>N</sup>   | AR, USA       | JN541447                |
| 1166-02        | weed                                  | SD <sub>1-2</sub> <sup>N</sup>   | MS, USA       | JN541455                |
| Dongjin        | <i>O. sativa</i> ssp. <i>japonica</i> | SD <sub>1-2</sub> <sup>N</sup>   | South Korea   | KT354862                |
| Nipponbare     | <i>O. sativa</i> ssp. <i>japonica</i> | SD <sub>1-2</sub> <sup>N</sup>   | Japan         | AB633625                |
| 5857           | <i>O. sativa</i> ssp. <i>japonica</i> | SD <sub>1-2</sub> <sup>N</sup>   | Bangladesh    | JN541474                |
| 25901          | <i>O. sativa</i> ssp. <i>japonica</i> | SD <sub>1-2</sub> <sup>N</sup>   | Bangladesh    | JN541533                |
| 1107           | <i>O. sativa</i> ssp. <i>japonica</i> | SD <sub>1-2</sub> <sup>N</sup>   | China         | JN541528                |
| 42469          | <i>O. sativa</i> ssp. <i>japonica</i> | SD <sub>1-2</sub> <sup>N</sup>   | India         | JN541514                |
| 43372          | <i>O. sativa</i> ssp. <i>japonica</i> | SD <sub>1-2</sub> <sup>N</sup>   | Indonesia     | JN541535                |
| 12880          | <i>O. sativa</i> ssp. <i>japonica</i> | SD <sub>1-2</sub> <sup>N</sup>   | Iran          | JN541513                |
| RA4990         | <i>O. sativa</i> ssp. <i>japonica</i> | SD <sub>1-2</sub> <sup>N</sup>   | Japan         | JN541529                |
| RA5123         | <i>O. sativa</i> ssp. <i>japonica</i> | SD <sub>1-2</sub> <sup>N</sup>   | Philippines   | JN541531                |
| RA5333         | <i>O. sativa</i> ssp. <i>japonica</i> | SD <sub>1-2</sub> <sup>N</sup>   | Philippines   | JN541537                |
| 24225          | <i>O. sativa</i> ssp. <i>japonica</i> | SD <sub>1-2</sub> <sup>N</sup>   | Thailand      | JN541532                |
| RA5294         | <i>O. sativa</i> ssp. <i>japonica</i> | SD <sub>1-2</sub> <sup>N</sup>   | Thailand      | JN541534                |
| Clor1206       | <i>O. sativa</i> ssp. <i>japonica</i> | SD <sub>1-2</sub> <sup>N</sup>   | USA           | JN541468                |
| Clor1779       | <i>O. sativa</i> ssp. <i>japonica</i> | SD <sub>1-2</sub> <sup>N</sup>   | USA           | JN541472                |

|                |                                       |                                |              |          |
|----------------|---------------------------------------|--------------------------------|--------------|----------|
| Clor1962       | <i>O. sativa</i> ssp. <i>japonica</i> | SD <sub>1-2</sub> <sup>N</sup> | USA          | JN541465 |
| Clor2127       | <i>O. sativa</i> ssp. <i>japonica</i> | SD <sub>1-2</sub> <sup>N</sup> | USA          | JN541470 |
| Clor7787       | <i>O. sativa</i> ssp. <i>japonica</i> | SD <sub>1-2</sub> <sup>N</sup> | USA          | JN541473 |
| Clor8993       | <i>O. sativa</i> ssp. <i>japonica</i> | SD <sub>1-2</sub> <sup>N</sup> | USA          | JN541466 |
| Clor9463       | <i>O. sativa</i> ssp. <i>japonica</i> | SD <sub>1-2</sub> <sup>N</sup> | USA          | JN541471 |
| RA4945         | <i>O. sativa</i> ssp. <i>japonica</i> | SD <sub>1-2</sub> <sup>N</sup> | Vietnam      | JN541530 |
| Aijjaonuo      | <i>O. sativa</i> ssp. <i>japonica</i> | SD <sub>1-2</sub> <sup>N</sup> | China        | AB633597 |
| Asahi          | <i>O. sativa</i> ssp. <i>japonica</i> | SD <sub>1-2</sub> <sup>N</sup> | Japan        | AB633595 |
| Calutos        | <i>O. sativa</i> ssp. <i>japonica</i> | SD <sub>1-2</sub> <sup>N</sup> | Philippines  | AB633608 |
| Dabaigu        | <i>O. sativa</i> ssp. <i>japonica</i> | SD <sub>1-2</sub> <sup>N</sup> | China        | AB633598 |
| Dangrey        | <i>O. sativa</i> ssp. <i>japonica</i> | SD <sub>1-2</sub> <sup>N</sup> | Bhutan       | AB633605 |
| Dinalaga       | <i>O. sativa</i> ssp. <i>japonica</i> | SD <sub>1-2</sub> <sup>N</sup> | Philippines  | AB633596 |
| Jaguary        | <i>O. sativa</i> ssp. <i>japonica</i> | SD <sub>1-2</sub> <sup>N</sup> | Brazil       | AB633603 |
| Khao_Nam_Jen   | <i>O. sativa</i> ssp. <i>japonica</i> | SD <sub>1-2</sub> <sup>N</sup> | Laos         | AB633593 |
| Khau_Mac_Kho   | <i>O. sativa</i> ssp. <i>japonica</i> | SD <sub>1-2</sub> <sup>N</sup> | Vietnam      | AB633602 |
| Khau_Tan_Chien | <i>O. sativa</i> ssp. <i>japonica</i> | SD <sub>1-2</sub> <sup>N</sup> | Vietnam      | AB633594 |
| Khauk_Yoe      | <i>O. sativa</i> ssp. <i>japonica</i> | SD <sub>1-2</sub> <sup>N</sup> | Myanmar      | AB633607 |
| Ma_sho         | <i>O. sativa</i> ssp. <i>japonica</i> | SD <sub>1-2</sub> <sup>N</sup> | Myanmar      | AB633604 |
| Padi_Perak     | <i>O. sativa</i> ssp. <i>japonica</i> | SD <sub>1-2</sub> <sup>N</sup> | Indonesia    | AB633601 |
| PI596758       | <i>O. sativa</i> ssp. <i>japonica</i> | SD <sub>1-2</sub> <sup>N</sup> | USA          | JN541469 |
| Tamasari       | <i>O. sativa</i> ssp. <i>japonica</i> | SD <sub>1-2</sub> <sup>N</sup> | Japan        | AB633606 |
| Tima           | <i>O. sativa</i> ssp. <i>japonica</i> | SD <sub>1-2</sub> <sup>N</sup> | Bhutan       | AB633600 |
| Tupa729        | <i>O. sativa</i> ssp. <i>japonica</i> | SD <sub>1-2</sub> <sup>N</sup> | Bangladesh   | AB633599 |
| Turakin        | <i>O. sativa</i> ssp. <i>japonica</i> | SD <sub>1-2</sub> <sup>N</sup> | Malaysia     | AB633609 |
| Urasan_1       | <i>O. sativa</i> ssp. <i>japonica</i> | SD <sub>1-2</sub> <sup>N</sup> | Japan        | AB633592 |
| 101226         | <i>O. barthii</i>                     | SD <sub>1-2</sub> <sup>S</sup> | Nigeria      | JN541505 |
| 104081         | <i>O. barthii</i>                     | SD <sub>1-2</sub> <sup>S</sup> | Nigeria      | JN541506 |
| 101855         | <i>O. glaberrima</i>                  | SD <sub>1-2</sub> <sup>S</sup> | Burkina_Faso | JN541509 |
| 86779          | <i>O. glaberrima</i>                  | SD <sub>1-2</sub> <sup>S</sup> | Liberia      | JN541507 |
| 102410         | <i>O. glaberrima</i>                  | SD <sub>1-2</sub> <sup>S</sup> | Mali         | JN541510 |
| 100983         | <i>O. glaberrima</i>                  | SD <sub>1-2</sub> <sup>S</sup> | Nigeria      | JN541508 |
| 103821         | <i>O. nivara</i>                      | SD <sub>1-2</sub> <sup>S</sup> | China        | JN541504 |
| 86662          | <i>O. nivara</i>                      | SD <sub>1-2</sub> <sup>S</sup> | Thailand     | JN541503 |
| 105888         | <i>O. rufipogon</i>                   | SD <sub>1-2</sub> <sup>S</sup> | Bangladesh   | JN541492 |
| 105720         | <i>O. rufipogon</i>                   | SD <sub>1-2</sub> <sup>S</sup> | Cambodia     | JN541490 |
| 106321         | <i>O. rufipogon</i>                   | SD <sub>1-2</sub> <sup>S</sup> | Cambodia     | JN541500 |
| 100916         | <i>O. rufipogon</i>                   | SD <sub>1-2</sub> <sup>S</sup> | China        | JN541480 |
| 104624         | <i>O. rufipogon</i>                   | SD <sub>1-2</sub> <sup>S</sup> | China        | JN541483 |
| 104501         | <i>O. rufipogon</i>                   | SD <sub>1-2</sub> <sup>S</sup> | India        | JN541481 |
| 105711         | <i>O. rufipogon</i>                   | SD <sub>1-2</sub> <sup>S</sup> | India        | JN541489 |

|        |                                     |                                |             |          |
|--------|-------------------------------------|--------------------------------|-------------|----------|
| 106086 | <i>O. rufipogon</i>                 | SD <sub>1-2</sub> <sup>S</sup> | India       | JN541493 |
| 106103 | <i>O. rufipogon</i>                 | SD <sub>1-2</sub> <sup>S</sup> | India       | JN541494 |
| 106122 | <i>O. rufipogon</i>                 | SD <sub>1-2</sub> <sup>S</sup> | India       | JN541495 |
| 106134 | <i>O. rufipogon</i>                 | SD <sub>1-2</sub> <sup>S</sup> | India       | JN541496 |
| 106453 | <i>O. rufipogon</i>                 | SD <sub>1-2</sub> <sup>S</sup> | Indonesia   | JN541501 |
| 106150 | <i>O. rufipogon</i>                 | SD <sub>1-2</sub> <sup>S</sup> | Laos        | JN541497 |
| 106163 | <i>O. rufipogon</i>                 | SD <sub>1-2</sub> <sup>S</sup> | Laos        | JN541542 |
| 105491 | <i>O. rufipogon</i>                 | SD <sub>1-2</sub> <sup>S</sup> | Malaysia    | JN541487 |
| 81990  | <i>O. rufipogon</i>                 | SD <sub>1-2</sub> <sup>S</sup> | Myanmar     | JN541477 |
| 105568 | <i>O. rufipogon</i>                 | SD <sub>1-2</sub> <sup>S</sup> | Philippines | JN541488 |
| 104599 | <i>O. rufipogon</i>                 | SD <sub>1-2</sub> <sup>S</sup> | Sri Lanka   | JN541482 |
| 100904 | <i>O. rufipogon</i>                 | SD <sub>1-2</sub> <sup>S</sup> | Thailand    | JN541479 |
| 104714 | <i>O. rufipogon</i>                 | SD <sub>1-2</sub> <sup>S</sup> | Thailand    | JN541484 |
| 104833 | <i>O. rufipogon</i>                 | SD <sub>1-2</sub> <sup>S</sup> | Thailand    | JN541485 |
| 104871 | <i>O. rufipogon</i>                 | SD <sub>1-2</sub> <sup>S</sup> | Thailand    | JN541486 |
| 105855 | <i>O. rufipogon</i>                 | SD <sub>1-2</sub> <sup>S</sup> | Thailand    | JN541491 |
| 106168 | <i>O. rufipogon</i>                 | SD <sub>1-2</sub> <sup>S</sup> | Vietnam     | JN541498 |
| 106169 | <i>O. rufipogon</i>                 | SD <sub>1-2</sub> <sup>S</sup> | Vietnam     | JN541499 |
| 106518 | <i>O. rufipogon</i>                 | SD <sub>1-2</sub> <sup>S</sup> | Vietnam     | JN541502 |
| AS049  | <i>O. rufipogon</i>                 | SD <sub>1-2</sub> <sup>S</sup> | Sri Lanka   | AB633573 |
| AS052  | <i>O. rufipogon</i>                 | SD <sub>1-2</sub> <sup>S</sup> | Bangladesh  | AB633574 |
| 105402 | <i>O. rufipogon</i>                 | SD <sub>1-2</sub> <sup>S</sup> | China       | AB633591 |
| W0108  | <i>O. rufipogon</i>                 | SD <sub>1-2</sub> <sup>S</sup> | India       | AB633575 |
| W0593  | <i>O. rufipogon</i>                 | SD <sub>1-2</sub> <sup>S</sup> | Malaysia    | AB633576 |
| W1294  | <i>O. rufipogon</i>                 | SD <sub>1-2</sub> <sup>S</sup> | Philippines | AB633577 |
| W1666  | <i>O. rufipogon</i>                 | SD <sub>1-2</sub> <sup>S</sup> | India       | AB633578 |
| W1685  | <i>O. rufipogon</i>                 | SD <sub>1-2</sub> <sup>S</sup> | India       | AB633579 |
| W1715  | <i>O. rufipogon</i>                 | SD <sub>1-2</sub> <sup>S</sup> | China       | AB633580 |
| W1852  | <i>O. rufipogon</i>                 | SD <sub>1-2</sub> <sup>S</sup> | Thailand    | AB633581 |
| W1943  | <i>O. rufipogon</i>                 | SD <sub>1-2</sub> <sup>S</sup> | China       | AB633589 |
| W1945  | <i>O. rufipogon</i>                 | SD <sub>1-2</sub> <sup>S</sup> | China       | AB633582 |
| W1954  | <i>O. rufipogon</i>                 | SD <sub>1-2</sub> <sup>S</sup> | China       | AB633590 |
| W1958  | <i>O. rufipogon</i>                 | SD <sub>1-2</sub> <sup>S</sup> | China       | AB633583 |
| W1981  | <i>O. rufipogon</i>                 | SD <sub>1-2</sub> <sup>S</sup> | Indonesia   | AB633584 |
| W2263  | <i>O. rufipogon</i>                 | SD <sub>1-2</sub> <sup>S</sup> | Colombia    | AB633585 |
| W2264  | <i>O. rufipogon</i>                 | SD <sub>1-2</sub> <sup>S</sup> | Vietnam     | AB633586 |
| W2265  | <i>O. rufipogon</i>                 | SD <sub>1-2</sub> <sup>S</sup> | Laos        | AB633587 |
| W2266  | <i>O. rufipogon</i>                 | SD <sub>1-2</sub> <sup>S</sup> | Laos        | AB633588 |
| 8839   | <i>O. sativa</i> ssp. <i>indica</i> | SD <sub>1-2</sub> <sup>S</sup> | Bangladesh  | JN541517 |
| 27513  | <i>O. sativa</i> ssp. <i>indica</i> | SD <sub>1-2</sub> <sup>S</sup> | Bangladesh  | JN541523 |

|                 |                                       |                                |            |          |
|-----------------|---------------------------------------|--------------------------------|------------|----------|
| 29016           | <i>O. sativa</i> ssp. <i>indica</i>   | SD <sub>1-2</sub> <sup>S</sup> | Bangladesh | JN541476 |
| RA7180          | <i>O. sativa</i> ssp. <i>indica</i>   | SD <sub>1-2</sub> <sup>S</sup> | Bangladesh | JN541519 |
| 51250           | <i>O. sativa</i> ssp. <i>indica</i>   | SD <sub>1-2</sub> <sup>S</sup> | China      | JN541524 |
| 6307            | <i>O. sativa</i> ssp. <i>indica</i>   | SD <sub>1-2</sub> <sup>S</sup> | India      | JN541515 |
| 45195           | <i>O. sativa</i> ssp. <i>indica</i>   | SD <sub>1-2</sub> <sup>S</sup> | India      | JN541518 |
| RA4956          | <i>O. sativa</i> ssp. <i>indica</i>   | SD <sub>1-2</sub> <sup>S</sup> | India      | JN541522 |
| Kasalath/RA7221 | <i>O. sativa</i> ssp. <i>indica</i>   | SD <sub>1-2</sub> <sup>S</sup> | India      | JN541516 |
| 43545           | <i>O. sativa</i> ssp. <i>indica</i>   | SD <sub>1-2</sub> <sup>S</sup> | Indonesia  | JN541527 |
| 58930           | <i>O. sativa</i> ssp. <i>indica</i>   | SD <sub>1-2</sub> <sup>S</sup> | Nepal      | JN541526 |
| 22739           | <i>O. sativa</i> ssp. <i>indica</i>   | SD <sub>1-2</sub> <sup>S</sup> | Sri Lanka  | JN541475 |
| RA4878          | <i>O. sativa</i> ssp. <i>indica</i>   | SD <sub>1-2</sub> <sup>S</sup> | Thailand   | JN541521 |
| RA7165          | <i>O. sativa</i> ssp. <i>indica</i>   | SD <sub>1-2</sub> <sup>S</sup> | Vietnam    | JN541525 |
| ARC_5955        | <i>O. sativa</i> ssp. <i>indica</i>   | SD <sub>1-2</sub> <sup>S</sup> | India      | AB633611 |
| ARC_7291        | <i>O. sativa</i> ssp. <i>indica</i>   | SD <sub>1-2</sub> <sup>S</sup> | India      | AB633613 |
| Deng_Pao_Zhai   | <i>O. sativa</i> ssp. <i>indica</i>   | SD <sub>1-2</sub> <sup>S</sup> | China      | AB633622 |
| Jinguoyin       | <i>O. sativa</i> ssp. <i>indica</i>   | SD <sub>1-2</sub> <sup>S</sup> | China      | AB633621 |
| Kalo_Dhan       | <i>O. sativa</i> ssp. <i>indica</i>   | SD <sub>1-2</sub> <sup>S</sup> | Nepal      | AB633616 |
| Naba            | <i>O. sativa</i> ssp. <i>indica</i>   | SD <sub>1-2</sub> <sup>S</sup> | India      | AB633618 |
| Nepal_555       | <i>O. sativa</i> ssp. <i>indica</i>   | SD <sub>1-2</sub> <sup>S</sup> | India      | AB633612 |
| Puluik_Arang    | <i>O. sativa</i> ssp. <i>indica</i>   | SD <sub>1-2</sub> <sup>S</sup> | Indonesia  | AB633619 |
| QiuZaoZhong     | <i>O. sativa</i> ssp. <i>indica</i>   | SD <sub>1-2</sub> <sup>S</sup> | China      | AB633620 |
| Shoni           | <i>O. sativa</i> ssp. <i>indica</i>   | SD <sub>1-2</sub> <sup>S</sup> | Bangladesh | AB633614 |
| Vandaran        | <i>O. sativa</i> ssp. <i>indica</i>   | SD <sub>1-2</sub> <sup>S</sup> | Sri Lanka  | AB633624 |
| 43397           | <i>O. sativa</i> ssp. <i>japonica</i> | SD <sub>1-2</sub> <sup>S</sup> | Indonesia  | JN541536 |
| SS18-2          | weed                                  | SD <sub>1-2</sub> <sup>S</sup> | Thailand   | KT354863 |
| LA3             | weed                                  | SD <sub>1-2</sub> <sup>S</sup> | LA, USA    | JN541427 |
| MS4R788_93      | weed                                  | SD <sub>1-2</sub> <sup>S</sup> | MS, USA    | JN541428 |
| StgB            | weed                                  | SD <sub>1-2</sub> <sup>S</sup> | AR, USA    | JN541429 |
| StgS            | weed                                  | SD <sub>1-2</sub> <sup>S</sup> | AR, USA    | JN541430 |
| TX4             | weed                                  | SD <sub>1-2</sub> <sup>S</sup> | TX, USA    | JN541431 |
| 10A             | weed                                  | SD <sub>1-2</sub> <sup>S</sup> | AR, USA    | JN541420 |
| 16B             | weed                                  | SD <sub>1-2</sub> <sup>S</sup> | AR, USA    | JN541421 |
| 1004-01         | weed                                  | SD <sub>1-2</sub> <sup>S</sup> | MO, USA    | JN541407 |
| 1025-01         | weed                                  | SD <sub>1-2</sub> <sup>S</sup> | AR, USA    | JN541408 |
| 1081-01         | weed                                  | SD <sub>1-2</sub> <sup>S</sup> | AR, USA    | JN541409 |
| 1091-01         | weed                                  | SD <sub>1-2</sub> <sup>S</sup> | AR, USA    | JN541410 |
| 1196-01         | weed                                  | SD <sub>1-2</sub> <sup>S</sup> | AR, USA    | JN541412 |
| 1098-01         | weed                                  | SD <sub>1-2</sub> <sup>S</sup> | MO, USA    | JN541413 |
| 1134-01         | weed                                  | SD <sub>1-2</sub> <sup>S</sup> | AR, USA    | JN541414 |
| 1135-01         | weed                                  | SD <sub>1-2</sub> <sup>S</sup> | AR, USA    | JN541415 |

|         |      |                                |         |          |
|---------|------|--------------------------------|---------|----------|
| 1141-01 | weed | SD <sub>1-2</sub> <sup>S</sup> | AR, USA | JN541416 |
| 1160-01 | weed | SD <sub>1-2</sub> <sup>S</sup> | AR, USA | JN541417 |
| 1179-01 | weed | SD <sub>1-2</sub> <sup>S</sup> | LA, USA | JN541418 |
| 1188-01 | weed | SD <sub>1-2</sub> <sup>S</sup> | MS, USA | JN541419 |
| 1995-15 | weed | SD <sub>1-2</sub> <sup>S</sup> | AR, USA | JN541423 |
| 1996-01 | weed | SD <sub>1-2</sub> <sup>S</sup> | AR, USA | JN541424 |
| 1996-09 | weed | SD <sub>1-2</sub> <sup>S</sup> | MS, USA | JN541426 |
| 1001-01 | weed | SD <sub>1-2</sub> <sup>S</sup> | AR, USA | JN541432 |
| 1002-02 | weed | SD <sub>1-2</sub> <sup>S</sup> | AR, USA | JN541433 |
| 1042-01 | weed | SD <sub>1-2</sub> <sup>S</sup> | AR, USA | JN541435 |
| 1047-01 | weed | SD <sub>1-2</sub> <sup>S</sup> | LA, USA | JN541436 |
| 1073-02 | weed | SD <sub>1-2</sub> <sup>S</sup> | MO, USA | JN541437 |
| 1092-02 | weed | SD <sub>1-2</sub> <sup>S</sup> | MS, USA | JN541438 |
| 1111-01 | weed | SD <sub>1-2</sub> <sup>S</sup> | AR, USA | JN541439 |
| 1190-01 | weed | SD <sub>1-2</sub> <sup>S</sup> | LA, USA | JN541440 |
| 1199-01 | weed | SD <sub>1-2</sub> <sup>S</sup> | MO, USA | JN541441 |
| 1300-02 | weed | SD <sub>1-2</sub> <sup>S</sup> | MO, USA | JN541442 |
| 1344-02 | weed | SD <sub>1-2</sub> <sup>S</sup> | MO, USA | JN541443 |
| 1995-12 | weed | SD <sub>1-2</sub> <sup>S</sup> | LA, USA | JN541448 |
| 1995-13 | weed | SD <sub>1-2</sub> <sup>S</sup> | LA, USA | JN541449 |
| 1995-14 | weed | SD <sub>1-2</sub> <sup>S</sup> | LA, USA | JN541450 |
| 1996-08 | weed | SD <sub>1-2</sub> <sup>S</sup> | AR, USA | JN541451 |
| 1183-01 | weed | SD <sub>1-2</sub> <sup>S</sup> | AR, USA | JN541454 |
| 1107-01 | weed | SD <sub>1-2</sub> <sup>S</sup> | AR, USA | JN541456 |
| 1210-02 | weed | SD <sub>1-2</sub> <sup>S</sup> | MO, USA | JN541457 |
| 1214-02 | weed | SD <sub>1-2</sub> <sup>S</sup> | LA, USA | JN541458 |
| 1163-01 | weed | SD <sub>1-2</sub> <sup>S</sup> | LA, USA | JN541459 |
| 1333-02 | weed | SD <sub>1-2</sub> <sup>S</sup> | MO, USA | JN541460 |
| 1202-02 | weed | SD <sub>1-2</sub> <sup>S</sup> | AR, USA | JN541461 |

<sup>a</sup> Refer to Fig. 10A for protein sequences.

<sup>b</sup> The IDs start with "JN" from Reagon et al. 2011 and with "AB" from Asano et al., 2011, AY115558 (Septiningsih EM, Thomson, MJ, Trijatmiko, KR, Moeljopawiro S, McCouch SR, Plant Breeding, Cornell University, 418 Bradfield Hall, Ithaca, NY 14853, USA), AF465256 (Yoon UH, Eun MY, Kim YH, Lee JS., Yun DW, Kim HI, Hahn JH, Cytogenetics, National Institute of Agricultural Science and Technology, 249 Seodun-dong, Suweon 441-707, Korea), and the others from this research. EM93-1-like refers to those that have no ID# available but have 1058 bp for exon 1 to 2 identical to SD<sub>1-2</sub><sup>E</sup>.
