# Supplementary material
Source: PubMed Central journal article supplement (PMC4634095)

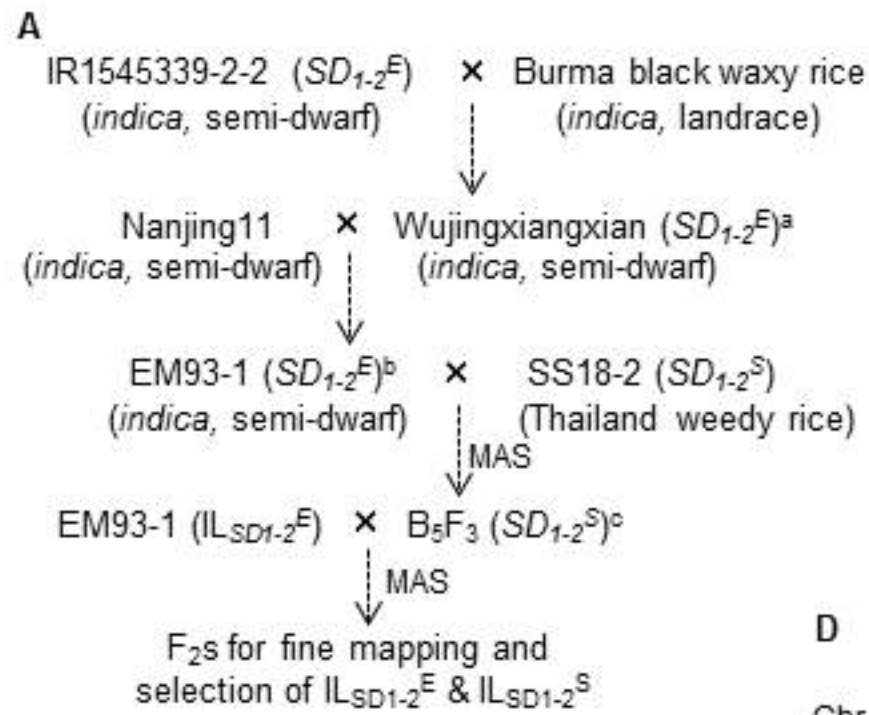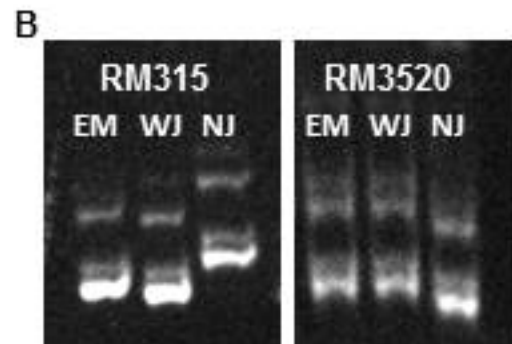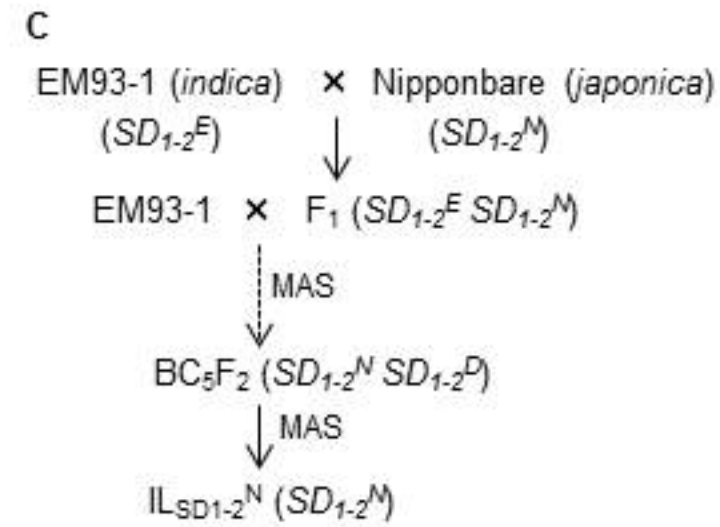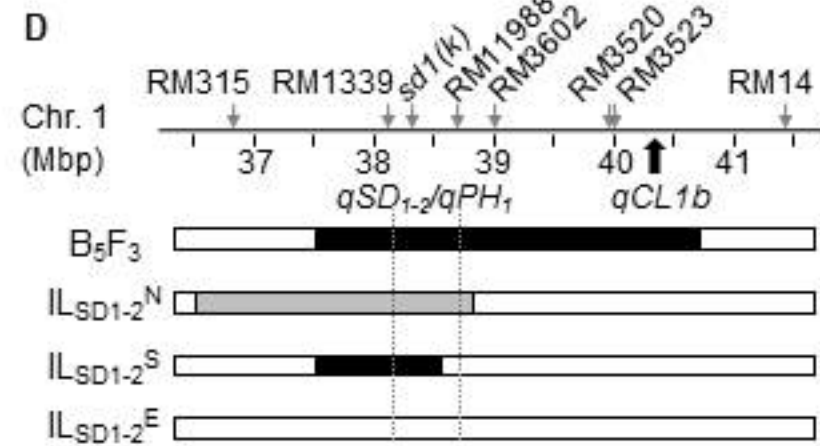

Supplement: supp_pp.15.01202_PP2015-01202R1_Figure_S1.pdf [file supp_pp.15.01202_PP2015-01202R1_Figure_S1.pdf]

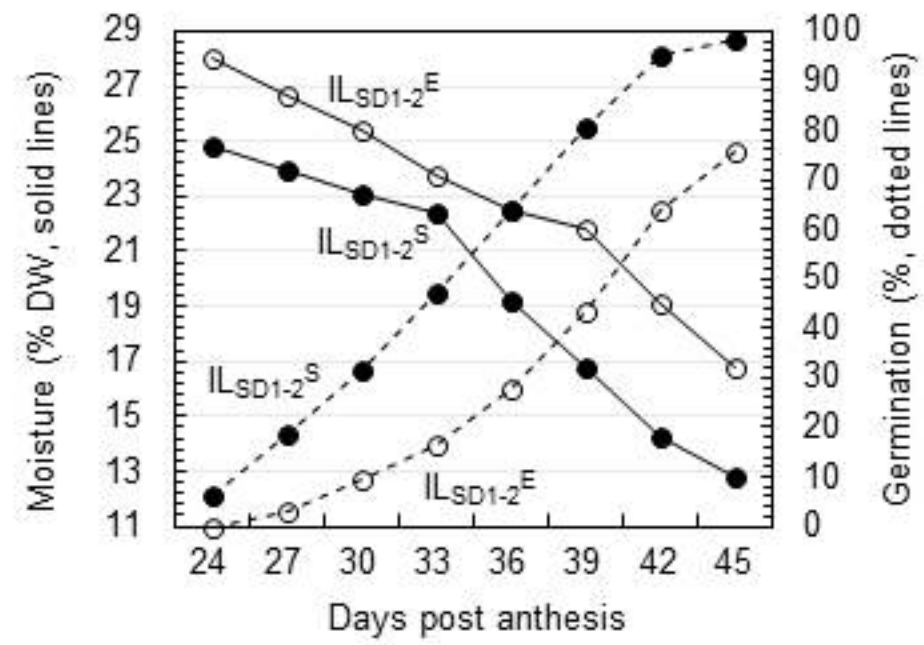

Supplement: supp_pp.15.01202_PP2015-01202R1_Figure_S2.pdf [file supp_pp.15.01202_PP2015-01202R1_Figure_S2.pdf]
